# Supplementary material for: Phytochemical Screening and Antibacterial Activity of Taxus baccata L. against Pectobacterium spp. and Dickeya chrysanthemi
Source: MDPI journal article supplement (doi:10.3390/horticulturae9020201), 2023-02-03
Supplement: s1 [file s1]

# Phytochemical Screening and Antibacterial Activity of *Taxus baccata* L. against *Pectobacterium* spp. and *Dickeya chrysanthemi*

Eva Sánchez-Hernández, Vicente González-García, Jesús Martín-Gil, Belén Lorenzo-Vidal, Ana Palacio-Bielsa, and Pablo Martín-Ramos

## SUPPLEMENTARY MATERIAL

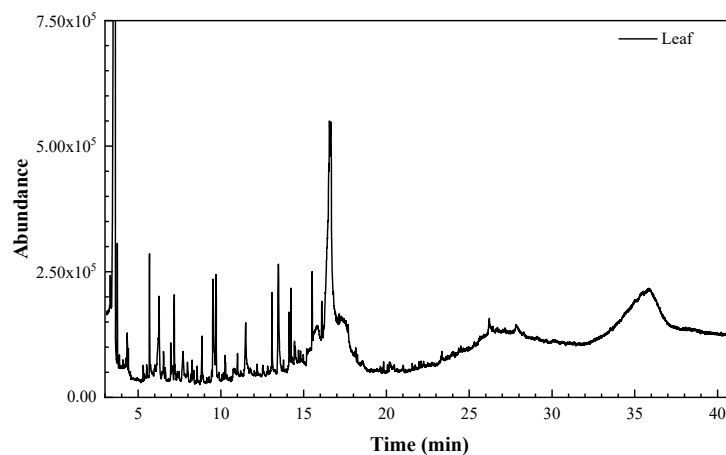

Figure S1. GC-MS chromatogram of *Taxus baccata* leaf aqueous ammonia extract.

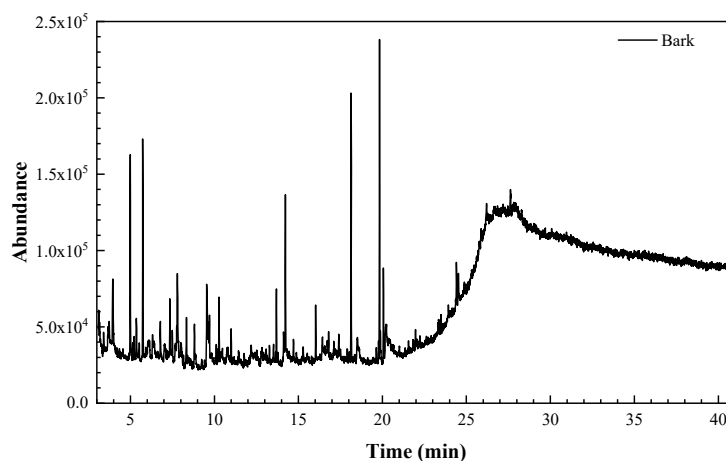

Figure S2. GC-MS chromatogram of *Taxus baccata* bark aqueous ammonia extract.

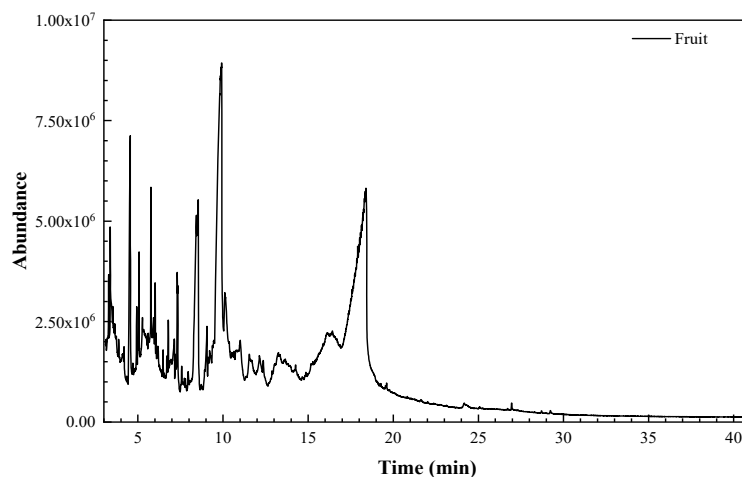

Figure S3. GC-MS chromatogram of *Taxus baccata* fruit hydromethanolic extract.

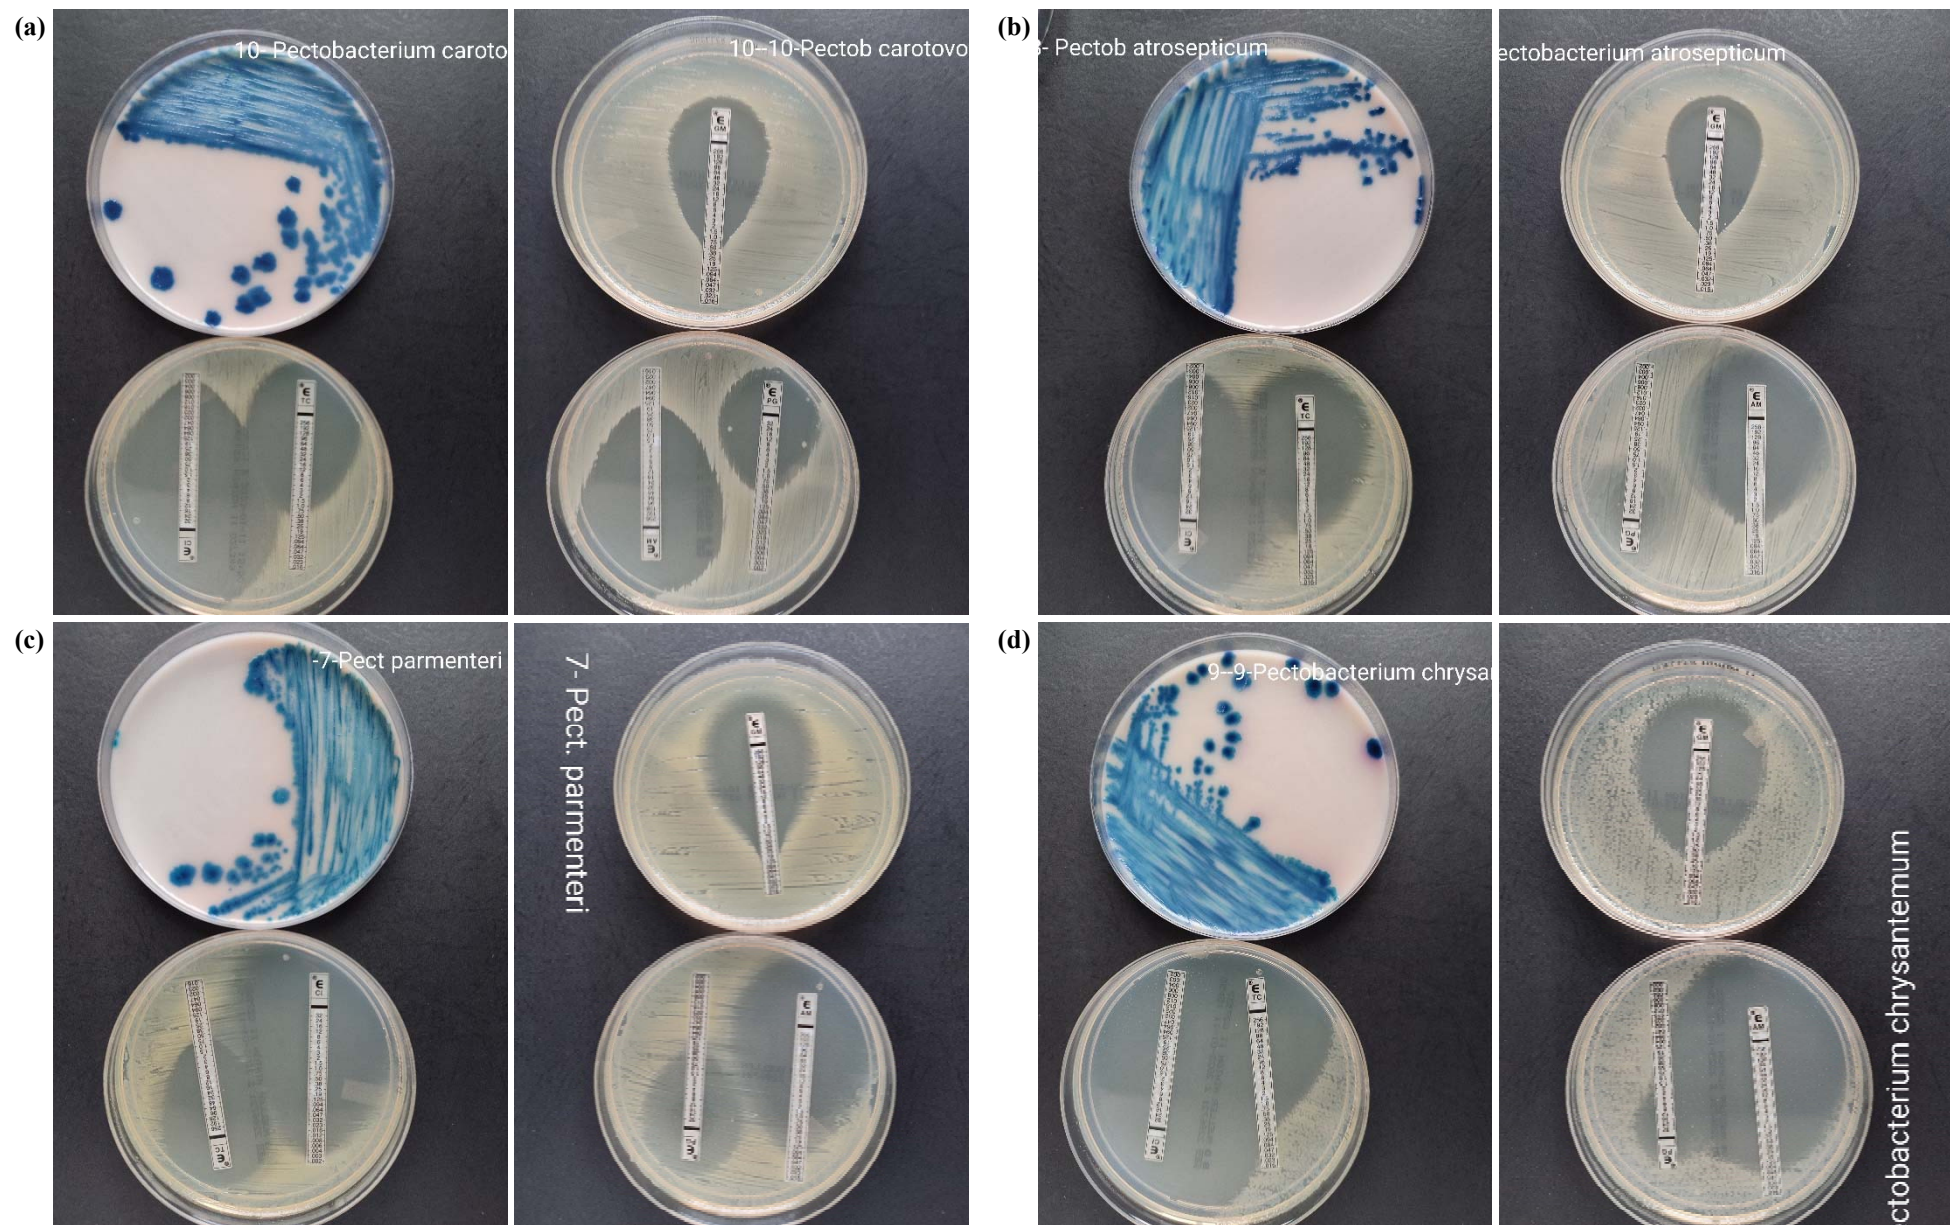

**Figure S4.** Examples of determination of minimum inhibitory concentrations of conventional antibiotics (for clinical use) against (a) *P. carotovorum* subsp. *carotovorum*; (b) *P. atrosepticum*; (c) *P. parmentieri*; and (d) *D. chrysanthemi* using ETEST<sup>®</sup> gradient MIC strips.

**Table S1.** Phytochemicals identified by GC-MS in *Taxus baccata* leaf aqueous ammonia extract.

| RT (min) | Area (%) | Assignment                                                                                                                                              | Qual     |
|----------|----------|---------------------------------------------------------------------------------------------------------------------------------------------------------|----------|
| 3.3242   | 0.666    | Acetic acid                                                                                                                                             | 43       |
| 3.7456   | 1.455    | 2-Propanone, 1-hydroxy-                                                                                                                                 | 59       |
| 4.3450   | 0.912    | Formic acid, 1-methylethyl ester                                                                                                                        | 47       |
| 4.4103   | 0.534    | 2,3-Butanediol                                                                                                                                          | 50       |
| 5.3125   | 0.302    | Oxime-, methoxy-phenyl-                                                                                                                                 | 81       |
| 5.6924   | 2.633    | 2-Cyclopenten-1-one, 2-hydroxy- // 1,2-Cyclopentanedione                                                                                                | 83 // 64 |
| 6.2147   | 2.968    | Phenol                                                                                                                                                  | 95       |
| 6.2681   | 3.918    | Phenol                                                                                                                                                  | 55       |
| 6.5411   | 1.239    | But-3-en-1-ynyl ethyl sulfide                                                                                                                           | 27       |
| 6.9744   | 0.912    | 2-Cyclopenten-1-one, 2-hydroxy-3-methyl-                                                                                                                | 95       |
| 7.0575   | 1.073    | Benzeneacetaldehyde                                                                                                                                     | 70       |
| 7.1821   | 1.686    | Pyrollidine, 2,5-bis(imino)-                                                                                                                            | 59       |
| 7.7104   | 2.366    | Phenol, 2-methoxy-                                                                                                                                      | 94       |
| 7.9834   | 0.926    | N-(3,5-Dinitropyridin-2-yl)-L-aspartic acid                                                                                                             | 43       |
| 8.2683   | 0.534    | 2-Cyclopenten-1-one, 3-ethyl-2-hydroxy-                                                                                                                 | 91       |
| 8.5710   | 0.609    | Oxalic acid, isohexyl neopentyl ester                                                                                                                   | 35       |
| 8.8618   | 1.935    | Benzoic acid                                                                                                                                            | 97       |
| 9.5206   | 6.201    | Catechol                                                                                                                                                | 97       |
| 9.7106   | 3.373    | Benzofuran, 2,3-dihydro-                                                                                                                                | 62       |
| 10.2566  | 0.571    | 3-Furylmethyl acetate                                                                                                                                   | 43       |
| 10.2804  | 0.393    | Benzene, 1-methyl-4-(1-methylpropyl)-                                                                                                                   | 94       |
| 11.0045  | 1.057    | 2-Methoxy-4-vinylphenol                                                                                                                                 | 70       |
| 11.5030  | 4.052    | 1,3-Cyclohexanedione, 2-methyl- // Cyclohexanone, 2-ethyl-                                                                                              | 45 // 38 |
| 13.0937  | 2.335    | Phenol, 3,5-dimethoxy-                                                                                                                                  | 94       |
| 13.4735  | 7.683    | 2,3-Dimethyl-cyclohexa-1,3-diene // 2-Acetyl-1-phenylhydrazine                                                                                          | 42 // 38 |
| 14.1324  | 2.290    | 2-Butanone, 4-(4-hydroxyphenyl)-                                                                                                                        | 94       |
| 14.2392  | 2.150    | 2-n-Propyladamantane                                                                                                                                    | 80       |
| 14.4469  | 0.739    | Benzenepropanoic acid, 4-hydroxy-, methyl ester                                                                                                         | 68       |
| 14.4944  | 0.920    | 2,6-Dimethyl-3-aminobenzoquinone                                                                                                                        | 70       |
| 15.1889  | 0.180    | Naphthalene, 2-butyldecahydro-                                                                                                                          | 60       |
| 15.5153  | 1.825    | 2-Cyclohexen-1-one, 3,5,5-trimethyl-4-(3-oxobutyl)-                                                                                                     | 98       |
| 15.6340  | 0.489    | Card-20(22)-enolide, 3-[(2,6-dideoxy-4-O-.beta.-D-glucopyranosyl-3-O-methyl-.beta.-D-ribo-hexopyranosyl)oxy]-5,14-dihydroxy-19-oxo-, (3.beta.,5.beta.)- | 53       |
| 15.6577  | 0.138    | 3-Ethyl-4-methyl-3-heptanol                                                                                                                             | 43       |
| 15.8061  | 0.503    | .alpha.-Methyl 4-O-methyl-D-mannoside                                                                                                                   | 50       |
| 16.0970  | 1.020    | Benzeneacetic acid, 4-hydroxy-3-methoxy-, methyl ester                                                                                                  | 70       |
| 16.5243  | 16.276   | Thiophene, hexyl-                                                                                                                                       | 43       |
| 16.5599  | 6.132    | Thiophene, hexyl-                                                                                                                                       | 35       |
| 16.6549  | 16.128   | D-Fructose, 3-O-methyl-                                                                                                                                 | 50       |
| 26.2166  | 0.663    | Benzo[h]quinoline, 2,4-dimethyl-                                                                                                                        | 43       |

**Table S2.** Main phytochemicals identified by GC-MS in *Taxus baccata* bark aqueous ammonia extract.

| RT (min) | Area (%) | Assignment                                                               | Qual     |
|----------|----------|--------------------------------------------------------------------------|----------|
| 4.9920   | 11.292   | Oxime-, methoxy-phenyl-                                                  | 87       |
| 5.7399   | 11.657   | 4-Acetamidobenzofuroxane // Benzoic acid, 3-(acetylamino)-, methyl ester | 53 // 50 |
| 7.7994   | 12.174   | Undecane                                                                 | 93       |
| 8.3455   | 3.184    | 1-Cyclohexene-1-carboxylic acid                                          | 96       |
| 8.8144   | 2.627    | Benzoic acid                                                             | 93       |
| 9.5503   | 6.411    | Catechol                                                                 | 94       |
| 10.2745  | 4.188    | Benzene, 1-methyl-4-(1-methylpropyl)-                                    | 81       |
| 13.6991  | 3.503    | Dodecanoic acid, methyl ester                                            | 96       |
| 14.2274  | 8.136    | 3,4-Methylenedioxyphenyl acetone                                         | 72       |
| 16.0317  | 2.844    | Methyl tetradecanoate                                                    | 96       |
| 18.1447  | 13.524   | Hexadecanoic acid, methyl ester                                          | 98       |
| 19.8303  | 15.679   | 9-Octadecenoic acid (Z)-, methyl ester                                   | 99       |
| 20.0677  | 4.781    | Methyl stearate                                                          | 99       |

**Table S3.** Phytochemicals identified by GC-MS in *Taxus baccata* fruit hydromethanolic extract.

| RT<br>(min) | Area<br>(%) | Assignment                                                | Qual |
|-------------|-------------|-----------------------------------------------------------|------|
| 3.1342      | 0.012       | 1-Butanol, 2-nitro-                                       | 35   |
| 3.2826      | 0.393       | 4-Pentenoic acid ethyl ester                              | 23   |
| 3.3776      | 1.245       | 4-Penten-2-one, 4-methyl-                                 | 14   |
| 3.5260      | 0.382       | Furfural                                                  | 60   |
| 3.6031      | 0.146       | Furfural                                                  | 76   |
| 3.6387      | 0.339       | Furfural                                                  | 60   |
| 3.7337      | 0.266       | Furfural                                                  | 46   |
| 3.8405      | 0.044       | 1H-Imidazole, 2,4-dimethyl-                               | 47   |
| 3.8762      | 0.131       | 1,6:2,3-Dianhydro-4-O-acetyl-.beta.-d-allopyranose        | 14   |
| 3.9296      | 0.066       | 2-Furanmethanol                                           | 89   |
| 4.1136      | 0.419       | 2-Furanmethanol                                           | 55   |
| 4.1848      | 0.165       | 2-Furanmethanol                                           | 96   |
| 4.3450      | 0.019       | 1,2,5-Oxadiazole-3-carboxamide, 4-amino-N-(2-aminoethyl)- | 28   |
| 4.5468      | 2.420       | Butanoic acid, 2,2-dimethyl-3-oxo-, methyl ester          | 40   |
| 4.7012      | 0.134       | 2-Butanone, 4-methoxy-                                    | 38   |
| 4.7843      | 0.088       | Acetic acid, hydroxy-, ethyl ester                        | 59   |
| 4.8436      | 0.100       | L-Talose, 6-deoxy-3-C-methyl-2-O-methyl-                  | 42   |
| 4.9326      | 0.464       | 2-Pyrrolidinecarboxamide, 5-oxo-, (S)-                    | 45   |
| 5.0038      | 0.265       | 1-Butanol                                                 | 38   |
| 5.0691      | 0.730       | 2-Cyclopenten-1-one, 2-hydroxy-                           | 86   |
| 5.1285      | 0.125       | Dihydroxyacetone                                          | 50   |
| 5.2709      | 1.000       | Hexafluoro-1,5-pentanediol                                | 37   |
| 5.3422      | 0.873       | 1,3-Dihydroxyacetone dimer                                | 50   |
| 5.4668      | 0.527       | Dihydroxyacetone                                          | 59   |
| 5.5618      | 0.253       | Dihydroxyacetone                                          | 50   |
| 5.6033      | 0.294       | 1,3-Dihydroxyacetone dimer                                | 45   |
| 5.6449      | 0.219       | Dihydroxyacetone                                          | 64   |
| 5.7695      | 1.501       | 2,4-Dihydroxy-2,5-dimethyl-3(2H)-furan-3-one              | 64   |
| 5.9238      | 0.975       | Dihydroxyacetone                                          | 55   |
| 6.0129      | 0.621       | 2H-Pyran-2,6(3H)-dione                                    | 43   |
| 6.0663      | 0.347       | dl-Glyceraldehyde dimer                                   | 50   |
| 6.1791      | 0.540       | Methyl-4-azido-4-desoxy.beta.l-arabinopyranoside          | 72   |
| 6.2681      | 0.406       | L-Mannose                                                 | 64   |
| 6.4817      | 0.242       | 1,2-Cyclopentanedione, 3-methyl-                          | 94   |
| 6.5530      | 0.141       | Glyceraldehyde                                            | 64   |
| 6.6242      | 0.056       | L-Mannose                                                 | 56   |
| 6.7013      | 0.193       | 1,2-Ethanediol, monoacetate                               | 38   |
| 6.7370      | 0.122       | Isosorbide Dinitrate                                      | 37   |
| 6.7904      | 0.320       | Propanal, 2,3-dihydroxy-, (S)-                            | 25   |
| 6.8972      | 0.299       | 2,4-Imidazolidinedione, 5-methyl-                         | 32   |
| 6.9447      | 0.283       | Galacto-heptulose                                         | 42   |
| 7.1406      | 0.762       | 2,5-Dimethyl-4-hydroxy-3(2H)-furanone                     | 52   |
| 7.1940      | 0.210       | 2,5-Furandicarboxaldehyde                                 | 50   |
| 7.3127      | 0.668       | Furyl hydroxymethyl ketone                                | 72   |
| 7.3364      | 0.432       | 2-Furancarboxylic acid, 1-methylethyl ester               | 38   |
| 7.5738      | 0.159       | Cyclohexanone, 2-ethyl-                                   | 32   |
| 7.6273      | 0.051       | d-Glycero-d-galacto-heptose                               | 42   |
| 7.6629      | 0.030       | 1-Nitro-2-acetamido-1,2-dideoxy-d-mannitol                | 40   |
| 7.7341      | 0.086       | Glyceraldehyde                                            | 35   |
| 7.7935      | 0.092       | Pyrimidine-4,6-diol, 5-methyl-                            | 52   |
| 7.9537      | 0.196       | Butanoic acid, 2-ethyl-2-methyl-                          | 38   |
| 8.0546      | 0.100       | 6-Methyl-2,3-dihydropyran-2,4-dione                       | 32   |
| 8.1199      | 0.064       | 5,8-Tridecadione                                          | 22   |
| 8.4345      | 3.083       | 4H-Pyran-4-one, 2,3-dihydro-3,5-dihydroxy-6-methyl-       | 76   |
| 8.5413      | 2.358       | 4H-Pyran-4-one, 2,3-dihydro-3,5-dihydroxy-6-methyl-       | 90   |
| 8.7194      | 0.109       | Isosorbide Dinitrate                                      | 32   |
| 9.0577      | 0.911       | 4H-Pyran-4-one, 3,5-dihydroxy-2-methyl-                   | 91   |
| 9.1348      | 0.304       | Catechol                                                  | 86   |
| 9.2179      | 0.696       | 2(3H)-Furanone, dihydro-4-hydroxy-                        | 52   |

|         |        |                                                                                                                                                         |          |
|---------|--------|---------------------------------------------------------------------------------------------------------------------------------------------------------|----------|
| 9.3782  | 0.329  | Tetrahydro-4H-pyran-4-ol                                                                                                                                | 49       |
| 9.4613  | 0.632  | s-Triazole, 3-acetamido-                                                                                                                                | 43       |
| 9.9183  | 13.191 | 5-Hydroxymethylfurfural                                                                                                                                 | 93       |
| 10.1082 | 2.846  | 6-Acetyl-.beta.-d-mannose                                                                                                                               | 25       |
| 10.4643 | 0.136  | Hexanoic acid, 3-hydroxy-, methyl ester                                                                                                                 | 32       |
| 10.5118 | 0.343  | Acetic acid n-octadecyl ester                                                                                                                           | 16       |
| 10.5830 | 0.346  | Acetic acid n-octadecyl ester                                                                                                                           | 25       |
| 10.6543 | 0.335  | Propanal, 2,3-dihydroxy-, (S)-                                                                                                                          | 27       |
| 10.7670 | 0.891  | Propanal, 2,3-dihydroxy-, (S)-                                                                                                                          | 27       |
| 10.8917 | 0.231  | Pentanoic acid, 2-methyl-4-oxo-                                                                                                                         | 38       |
| 11.0163 | 1.583  | Piperazine, 1,4-dinitroso-                                                                                                                              | 25       |
| 11.3665 | 0.259  | 1-Hexene-3,5-dione                                                                                                                                      | 27       |
| 11.5445 | 1.043  | Phenol, 4-propyl-                                                                                                                                       | 35       |
| 11.6989 | 0.685  | 1,3-Dioxane, 2-methyl-                                                                                                                                  | 27       |
| 11.9007 | 0.214  | 1,3-Dioxane, 4-methyl-                                                                                                                                  | 27       |
| 12.1440 | 1.362  | Ethanone, 1-(3-ethylcyclobutyl)-                                                                                                                        | 38       |
| 12.3636 | 0.755  | 4-Amino-1,6-dihydro-1-methyl-6-oxopyrimidine // Thiophene, 2-(1,1-dimethylethyl)-                                                                       | 46 // 43 |
| 12.6901 | 0.105  | 5-Hydroxymethylfurfural                                                                                                                                 | 27       |
| 13.0403 | 0.507  | Propanamide, N-acetyl-                                                                                                                                  | 35       |
| 13.2539 | 1.255  | 1,3-Dioxolane-4-methanol, .alpha.-ethynyl-2,2-dimethyl-, acetate                                                                                        | 14       |
| 13.3489 | 0.774  | 4-Nitro-3-oxobutyric acid, methyl ester // .alpha.-D-Mannopyranoside, methyl 3,6-anhydro-                                                               | 38 // 38 |
| 13.5269 | 0.204  | L-Alanine, 3-[(aminocarbonyl)amino]-                                                                                                                    | 35       |
| 13.5863 | 0.280  | N-Cyclooct-4-enylacetamide                                                                                                                              | 42       |
| 13.6575 | 0.644  | Isopropyl isothiocyanate                                                                                                                                | 12       |
| 13.7940 | 0.638  | Rhamnose                                                                                                                                                | 38       |
| 13.9424 | 0.538  | Decane, 1-fluoro-                                                                                                                                       | 42       |
| 14.0908 | 0.187  | 3-Methyl-4,7-dioxo-oct-2-enal                                                                                                                           | 30       |
| 14.1383 | 0.071  | 17-Pentatriacontene                                                                                                                                     | 22       |
| 14.2629 | 0.539  | Imidazole, 2-fluoro-1-triacetylribofuranosyl-                                                                                                           | 12       |
| 14.4054 | 0.306  | 1-Docosanol, acetate                                                                                                                                    | 27       |
| 14.5478 | 0.231  | 9-Acetoxynonanal                                                                                                                                        | 53       |
| 14.6606 | 0.253  | Tetraacetyl-d-glucosamine                                                                                                                               | 30       |
| 14.7200 | 0.124  | 9-Acetoxynonanal                                                                                                                                        | 53       |
| 14.8683 | 0.469  | .beta.-D-Glucopyranose, 4-O-.beta.-D-galactopyranosyl-                                                                                                  | 30       |
| 15.1770 | 0.894  | Decane, 1-fluoro-                                                                                                                                       | 35       |
| 15.2244 | 0.164  | Decane, 1-fluoro-                                                                                                                                       | 35       |
| 15.2838 | 0.322  | Maltose                                                                                                                                                 | 38       |
| 15.4144 | 0.500  | 1-Deoxy-d-altritol                                                                                                                                      | 55       |
| 15.4915 | 0.317  | .beta.-d-Lyxofuranoside, methyl                                                                                                                         | 35       |
| 15.6162 | 0.655  | .beta.-D-Glucopyranose, 4-O-.beta.-D-galactopyranosyl-                                                                                                  | 38       |
| 15.8655 | 1.625  | 3-Deoxy-d-mannonic lactone                                                                                                                              | 47       |
| 16.1444 | 0.433  | 3-Deoxy-d-mannonic lactone                                                                                                                              | 74       |
| 16.2038 | 0.494  | 3-Deoxy-d-mannonic lactone                                                                                                                              | 43       |
| 16.3344 | 0.895  | 3-Deoxy-d-mannonic lactone                                                                                                                              | 38       |
| 16.4293 | 2.486  | 3-Deoxy-d-mannonic lactone                                                                                                                              | 43       |
| 16.6845 | 0.917  | 3-Deoxy-d-mannonic acid                                                                                                                                 | 46       |
| 16.8685 | 0.505  | Hydroperoxide, 1,4-dioxan-2-yl                                                                                                                          | 52       |
| 16.9516 | 0.341  | Ethanol, 2-(2-ethoxyethoxy)-, acetate                                                                                                                   | 35       |
| 17.5867 | 5.963  | 1,3-Dioxolane, 2-(3-methoxypropyl)-2-methyl-                                                                                                            | 38       |
| 17.6460 | 0.792  | Thiophane, hexyl-                                                                                                                                       | 38       |
| 17.6935 | 0.713  | Uridine, 2'-O-methyl-                                                                                                                                   | 43       |
| 17.7529 | 0.989  | 1,3-Dioxolane, 2-methyl-2-(3-methylbutyl)-                                                                                                              | 38       |
| 17.8122 | 0.867  | Thiophene, tetrahydro-2-methyl-                                                                                                                         | 50       |
| 17.9191 | 1.325  | Thiophene, 2-ethyltetrahydro-                                                                                                                           | 43       |
| 17.9784 | 0.917  | .alpha.-D-Xylofuranoside, methyl 2-O-methyl-                                                                                                            | 43       |
| 18.0259 | 1.013  | .alpha.-D-Xylofuranoside, methyl 2-O-methyl-                                                                                                            | 43       |
| 18.0793 | 1.039  | .alpha.-D-Xylofuranoside, methyl 2-O-methyl-                                                                                                            | 43       |
| 18.1328 | 1.126  | .alpha.-D-Xylofuranoside, methyl 2-O-methyl-                                                                                                            | 43       |
| 18.3583 | 5.302  | 1-Propene, 3-[(4-nitrobutyl)thio]-                                                                                                                      | 53       |
| 18.4058 | 4.180  | .alpha.-D-Xylofuranoside, methyl 2-O-methyl-                                                                                                            | 43       |
| 19.2130 | 0.133  | .alpha.-Methyl 4-O-methyl-D-mannoside                                                                                                                   | 45       |
| 19.2783 | 0.358  | Card-20(22)-enolide, 3-[(2,6-dideoxy-4-O-.beta.-D-glucopyranosyl-3-O-methyl-.beta.-D-ribo-hexopyranosyl)oxy]-5,14-dihydroxy-19-oxo-, (3.beta.,5.beta.)- | 80       |

|         |       |                                                                                                                                                         |    |
|---------|-------|---------------------------------------------------------------------------------------------------------------------------------------------------------|----|
| 19.4860 | 0.111 | .alpha.-Methyl 4-O-methyl-D-mannoside                                                                                                                   | 43 |
| 19.5453 | 0.098 | Card-20(22)-enolide, 3-[(2,6-dideoxy-4-O-.beta.-D-glucopyranosyl-3-O-methyl-.beta.-D-ribo-hexopyranosyl)oxy]-5,14-dihydroxy-19-oxo-, (3.beta.,5.beta.)- | 72 |
| 19.6106 | 0.278 | Card-20(22)-enolide, 3-[(2,6-dideoxy-4-O-.beta.-D-glucopyranosyl-3-O-methyl-.beta.-D-ribo-hexopyranosyl)oxy]-5,14-dihydroxy-19-oxo-, (3.beta.,5.beta.)- | 62 |
| 19.7828 | 0.189 | Card-20(22)-enolide, 3-[(2,6-dideoxy-4-O-.beta.-D-glucopyranosyl-3-O-methyl-.beta.-D-ribo-hexopyranosyl)oxy]-5,14-dihydroxy-19-oxo-, (3.beta.,5.beta.)- | 64 |
| 20.8333 | 0.053 | Card-20(22)-enolide, 3-[(2,6-dideoxy-4-O-.beta.-D-glucopyranosyl-3-O-methyl-.beta.-D-ribo-hexopyranosyl)oxy]-5,14-dihydroxy-19-oxo-, (3.beta.,5.beta.)- | 38 |
| 21.6286 | 0.050 | 2,5-Furandione, dihydro-3-(2-methyl-2-propenyl)-                                                                                                        | 30 |
| 22.0263 | 0.007 | 2-Hexadecenoic acid, 2,3-dimethyl-, methyl ester, (E)-                                                                                                  | 45 |
| 22.3765 | 0.017 | Estra-1,3,5(10)-trien-17.beta.-ol                                                                                                                       | 46 |
| 23.1303 | 0.005 | N-Isopropoxy-2-carbomethoxyaziridine                                                                                                                    | 38 |
| 24.0384 | 0.002 | Bicyclo[2.2.1]heptan-2-one, 4,7,7-trimethyl-, semicarbazone                                                                                             | 43 |
| 24.1749 | 0.087 | 1,6-Dioxaspiro[4.4]nonane, 2-ethyl-                                                                                                                     | 25 |
| 24.3233 | 0.068 | 2H-Azepin-2-one, hexahydro-1-methyl-                                                                                                                    | 27 |
| 25.0236 | 0.004 | 1H-Indole, 5-methyl-2-phenyl-                                                                                                                           | 38 |
| 25.0771 | 0.012 | Ethanamine, 2-phenoxy-                                                                                                                                  | 35 |
| 25.2670 | 0.008 | Acetamide, N-(1-methyl-3-phenylpropyl)-                                                                                                                 | 27 |
| 25.9139 | 0.014 | 1H-Indole, 5-methyl-2-phenyl-                                                                                                                           | 38 |
| 26.7152 | 0.015 | 1H-Indole, 5-methyl-2-phenyl-                                                                                                                           | 35 |
| 26.7805 | 0.022 | 1H-Indole, 5-methyl-2-phenyl-                                                                                                                           | 30 |
| 26.9585 | 0.067 | 1-Nonadecene                                                                                                                                            | 38 |
| 27.3265 | 0.031 | Benzo[h]quinoline, 2,4-dimethyl-                                                                                                                        | 43 |
| 28.3177 | 0.004 | Benzo[h]quinoline, 2,4-dimethyl-                                                                                                                        | 43 |
| 28.7154 | 0.015 | Perhydro-htx-2-one, 2-depentyl-, acetate ester                                                                                                          | 56 |

**Table S4.** Effectiveness values reported in the literature for natural substances against *Pectobacterium atrosepticum*.

| Extract / Essential Oil                      | Effectiveness Values                                                                                    | Main Phytochemical Constituents                                                                                                                                                      | Ref.      |
|----------------------------------------------|---------------------------------------------------------------------------------------------------------|--------------------------------------------------------------------------------------------------------------------------------------------------------------------------------------|-----------|
| <i>Taxus baccata</i> fruit extract           | MIC = 1500 $\mu\text{g}\cdot\text{mL}^{-1}$                                                             | 5-hydroxymethylfurfural (13.3%); methyl 2-O-methyl- $\alpha$ -D-xylofuranoside (8.3%); and 1,3-dioxolane derivatives (8.2%)                                                          | This work |
| <i>T. baccata</i> bark extract               | MIC = 500 $\mu\text{g}\cdot\text{mL}^{-1}$                                                              | 9-octadecenoic acid, methyl ester (15.7%); hexadecanoic acid, methyl ester (13.5%); and undecane (12.2%)                                                                             |           |
| <i>T. baccata</i> leaf extract               | MIC = 187.5 $\mu\text{g}\cdot\text{mL}^{-1}$                                                            | 2-hexylthiophene (22.4%); 3-O-methyl-D-fructose (16.1%); and catechol (6.2%)                                                                                                         |           |
| <i>Pinus halepensis</i> cone EO              | DIZ = 10.33 mm, at 2000 $\mu\text{g}\cdot\text{mL}^{-1}$<br>MIC = 1000 $\mu\text{g}\cdot\text{mL}^{-1}$ | Caryophyllene (15.17%); $\alpha$ -pinene (13.51%); and caryophyllene oxide (12.57%)                                                                                                  | [1]       |
| <i>P. halepensis</i> cone n-butanol fraction | DIZ = 12.33 mm, at 2000 $\mu\text{g}\cdot\text{mL}^{-1}$<br>MIC = 225 $\mu\text{g}\cdot\text{mL}^{-1}$  | 3,4-dimethyldihydrofuran-2,5-dione (36.25%); 2-methylenecholestan-3-ol (18.12%); and (Z)-9-octadecenoic acid (13.45%)                                                                |           |
| <i>Eryngium triquetrum</i> aerial part EO    | PI = 85%, at 40,000 $\mu\text{g}\cdot\text{mL}^{-1}$                                                    | Falcarinal (74.8%); and octanal (5.6%)                                                                                                                                               | [2]       |
| <i>Smyrniolum olusatrum</i> root EO          | PI = 63%, at 40,000 $\mu\text{g}\cdot\text{mL}^{-1}$                                                    | Furanoteremophilene (31.5%); furanodiene (19.1%); and E-B-caryophyllene (11%)                                                                                                        |           |
| <i>Eucalyptus globulus</i> EO                | DIZ = 7.7 mm                                                                                            | Eucalyptol (66.21%); $\alpha$ -pinene (27.42%); and $\alpha$ -terpineol (1.82%)                                                                                                      | [3]       |
| <i>P. silvestris</i> EO                      | DIZ = 19.2 mm                                                                                           | Carene (23.51%); and bornyl acetate (20.31%)                                                                                                                                         |           |
| <i>Lavandula angustifolia</i> EO             | DIZ = 7.2 mm                                                                                            | Linalyl anthranilate (23.71%); linalool (15.22%); and borneol (15.04%)                                                                                                               |           |
| <i>Juniperus virginiana</i> EO               | DIZ = 12.2 mm                                                                                           | $\beta$ -himachalene (48.02%)                                                                                                                                                        |           |
| <i>Rosmarinus officinalis</i> EO             | DIZ = 6.1 mm                                                                                            | Eucalyptol (34%); and camphor (23%)                                                                                                                                                  |           |
| <i>Cupressus macrocarpa</i> branchlet EO     | MIC = 170 $\mu\text{g}\cdot\text{mL}^{-1}$                                                              | Terpinen-4-ol (23.7%); $\alpha$ -phellandrene (19.2%); and $\alpha$ -citronellol (17.3%)                                                                                             | [4]       |
| <i>Corymbia citriodora</i> leaf EO           | MIC = 170 $\mu\text{g}\cdot\text{mL}^{-1}$                                                              | $\alpha$ -citronellal (56.0%); $\alpha$ -citronellol (14.7%); and citronellol acetate (12.3%)                                                                                        |           |
| <i>Duranta plumieri variegata</i>            | DIZ = 9.3 mm, at 2000 $\mu\text{g}\cdot\text{mL}^{-1}$                                                  | 4,7-Dimethoxy-2-methylindan-1-one (66.67%); 5-(Hexadecyloxy)-2-pentadecyl-; and trans-1,3-dioxane (8.64%)                                                                            | [5]       |
| <i>Lantana camara</i> leaf extract           | DIZ = 9.6 mm, at 2000 $\mu\text{g}\cdot\text{mL}^{-1}$                                                  | 5,8-diethyl-dodecane (49.50%); pyrimidin-2-one, 4-[N-methylureido]-1-[4-methylaminocarbonyloxymethyl (36.26%); and oleic acid,3-(octadecyloxy)propyl ester (9.17%)                   |           |
| <i>Citharexylum spinosum</i> leaf extract    | DIZ = 13.6 mm, at 2000 $\mu\text{g}\cdot\text{mL}^{-1}$                                                 | 10-octadecenoic acid, methyl ester (24.66%); N-[5-(3-hydroxy-2-methylpropenyl)-1,3,4,5-tetrahydrobenzo[cd]indol-3-yl]-N-methylacetamide (17.02%); and 4,6-dimethyl-undecane (13.35%) |           |
| <i>Ceratonia siliqua</i> leaf extract        | MIC <sub>50</sub> = 1500–2400 $\mu\text{g}\cdot\text{mL}^{-1}$                                          | n.t.                                                                                                                                                                                 | [6]       |
| <i>C. siliqua</i> pod extract                | n.a.                                                                                                    |                                                                                                                                                                                      |           |
| <i>Trachyspermum ammi</i> EO                 | DIZ = 46.67 mm, at 400 $\mu\text{g}\cdot\text{mL}^{-1}$                                                 | n.t.                                                                                                                                                                                 | [7]       |

|                                                  |                                                         |      |      |
|--------------------------------------------------|---------------------------------------------------------|------|------|
| <i>Thymus vulgaris</i> EO                        | DIZ = 30.67 mm, at 400 $\mu\text{g}\cdot\text{mL}^{-1}$ |      |      |
| <i>Mentha aquatica</i> EO                        | DIZ = 15.33 mm, at 400 $\mu\text{g}\cdot\text{mL}^{-1}$ |      |      |
| <i>Eugenia caryophyllata</i> aerial part extract | PI = 100%, at 0.2%                                      | n.t. | [8]  |
| <i>Cinnamomum zelanicum</i> aerial part extract  | PI = 100%, at 0.5%                                      |      |      |
| <i>Datura metel</i> aerial part extract          | PI = 100%, at 0.5%                                      |      |      |
| <i>D. stramonium</i> leaf extract                | DIZ = 11.7 mm                                           |      |      |
| <i>Ficus carica</i> leaf extract                 | DIZ = 9.5 mm                                            |      |      |
| <i>Polygonum hydropiper</i> leaf extract         | DIZ = 9.2 mm                                            |      |      |
| <i>Populus alba</i> leaf extract                 | DIZ = 9.0 mm                                            |      |      |
| <i>Trigonella foenum-graecum</i> seed extract    | DIZ = 8.8 mm                                            |      |      |
| <i>Curcuma longa</i> rhizome extract             | DIZ = 8.2 mm                                            | n.t. | [9]  |
| <i>Azadirachta indica</i> leaf extract           | DIZ = 8.3 mm                                            |      |      |
| <i>Salix alba green</i> bark extract             | DIZ = 8.2 mm                                            |      |      |
| <i>Cannabis sativa</i> leaf PE                   | DIZ = 6.8 mm                                            |      |      |
| <i>Zingiber officinale</i> rhizome extract       | DIZ = 7.3 mm                                            |      |      |
| <i>Juglans regia</i> leaf extract                | DIZ = 6.6 mm                                            |      |      |
| <i>Conyza canadensis</i> leaf extract            | DIZ = 6.4 mm                                            |      |      |
| <i>Anthemis cotula</i> leaf extract              | DIZ = 4.5 mm                                            |      |      |
| <i>Delonix regia</i> bark extract                | MIC = 4000 $\mu\text{g}\cdot\text{mL}^{-1}$             | n.t. | [10] |
| <i>Erythrina humeana</i> bark extract            | MIC = 1000 $\mu\text{g}\cdot\text{mL}^{-1}$             |      |      |

MIC = Minimum Concentration Inhibition; MIC<sub>50</sub> = Minimum Concentration Inhibition at which 50% the isolates were inhibited; DIZ = Diameter Inhibition Zone (mm); PI = Percent Inhibition (%); PE = Plant Extract; EO = Essential Oil; n.a. = not activity; n.t. = not tested.



**Table S5.** Effectiveness values reported in the literature for natural substances against *Pectobacterium parmentieri*.

| Extract / Essential Oil               | Effectiveness Values                         | Main Phytochemical Constituents                                                                                             | Ref.      |
|---------------------------------------|----------------------------------------------|-----------------------------------------------------------------------------------------------------------------------------|-----------|
| <i>Taxus baccata</i> fruit extract    | MIC = 1000 $\mu\text{g}\cdot\text{mL}^{-1}$  | 5-hydroxymethylfurfural (13.3%); methyl 2-O-methyl- $\alpha$ -D-xylofuranoside (8.3%); and 1,3-dioxolane derivatives (8.2%) | This work |
| <i>T. baccata</i> bark extract        | MIC = 500 $\mu\text{g}\cdot\text{mL}^{-1}$   | 9-octadecenoic acid, methyl ester (15.7%); hexadecanoic acid, methyl ester (13.5%); and undecane (12.2%)                    |           |
| <i>T. baccata</i> leaf extract        | MIC = 187.5 $\mu\text{g}\cdot\text{mL}^{-1}$ | 2-hexylthiophene (22.4%); 3-O-methyl-D-fructose (16.1%); and catechol (6.2%)                                                |           |
| <i>Eucalyptus globulus</i> EO         | DIZ = 9.5 mm                                 | Eucalyptol (66.21%); $\alpha$ -pinene (27.42%); and $\alpha$ -terpineol (1.82%)                                             | [3]       |
| <i>Pinus sylvestris</i> EO            | DIZ = 31.7 mm                                | Carene (23.51%); and bornyl acetate (20.31%)                                                                                |           |
| <i>Lavandula angustifolia</i> EO      | DIZ = 10.0 mm                                | Linalyl anthranilate (23.71%); linalool (15.22%); and borneol (15.04%)                                                      |           |
| <i>Juniperus virginiana</i> EO        | DIZ = 4.9 mm                                 | $\beta$ -himachalene (48.02%)                                                                                               |           |
| <i>Rosmarinus officinalis</i> EO      | DIZ = 9.0 mm                                 | Eucalyptol (34%); and camphor (23%)                                                                                         |           |
| <i>Citrus paradisi</i> EO             | DIZ = 16.8 mm                                | Limonene (32.46%); and borneol (10.94%)                                                                                     | [10]      |
| <i>Delonix regia</i> bark extract     | MIC = 4000 $\mu\text{g}\cdot\text{mL}^{-1}$  | n.t                                                                                                                         |           |
| <i>Erythrina humeana</i> bark extract | MIC = 2000 $\mu\text{g}\cdot\text{mL}^{-1}$  |                                                                                                                             |           |

MIC = Minimum Concentration Inhibition; DIZ = Diameter Inhibition Zone (mm); EO = Essential Oil; n.a. = not activity; n.t. = not tested.

**Table S6.** Effectiveness values reported in the literature for natural substances against *Pectobacterium carotovorum* subsp. *carotovorum*.

| Extract / Essential Oil                  | Effectiveness Values                                             | Main Phytochemical Constituents                                                                                                                                                      | Ref.      |
|------------------------------------------|------------------------------------------------------------------|--------------------------------------------------------------------------------------------------------------------------------------------------------------------------------------|-----------|
| <i>Taxus baccata</i> fruit extract       | MIC = 1500 $\mu\text{g}\cdot\text{mL}^{-1}$                      | 5-hydroxymethylfurfural (13.3%); methyl 2-O-methyl- $\alpha$ -D-xylofuranoside (8.3%); and 1,3-dioxolane derivatives (8.2%)                                                          | This work |
| <i>T. baccata</i> bark extract           | MIC = 500 $\mu\text{g}\cdot\text{mL}^{-1}$                       | 9-octadecenoic acid, methyl ester (15.7%); hexadecanoic acid, methyl ester (13.5%); and undecane (12.2%)                                                                             |           |
| <i>T. baccata</i> leaf extract           | MIC = 187.5 $\mu\text{g}\cdot\text{mL}^{-1}$                     | 2-hexylthiophene (22.4%); 3-O-methyl-D-fructose (16.1%); and catechol (6.2%)                                                                                                         |           |
| <i>Eucalyptus globulus</i> EO            | DIZ = 5.4 mm                                                     | Eucalyptol (66.21%), $\alpha$ -pinene (27.42%), and $\alpha$ -terpineol (1.82%)                                                                                                      | [3]       |
| <i>Pinus sylvestris</i> EO               | DIZ = 26.6 mm                                                    | Carene (23.51%), and bornyl acetate (20.31%)                                                                                                                                         |           |
| <i>Lavandula angustifolia</i> EO         | DIZ = 12.4 mm                                                    | Linalyl anthranilate (23.71%), linalool (15.22%), and borneol (15.04%)                                                                                                               |           |
| <i>Juniperus virginiana</i> EO           | DIZ = 5.3 mm                                                     | $\beta$ -himachalene (48.02%)                                                                                                                                                        |           |
| <i>Rosmarinus officinalis</i> EO         | DIZ = 10.8 mm                                                    | Eucalyptol (34%), and camphor (23%)                                                                                                                                                  |           |
| <i>Citrus paradisi</i> EO                | DIZ = 16.8 mm                                                    | Limonene (32.46%), and borneol (10.94%)                                                                                                                                              | [4]       |
| <i>Cupressus macrocarpa</i> branchlet EO | MIC = 130 $\mu\text{g}\cdot\text{mL}^{-1}$                       | Terpinen-4-ol (23.7%), $\alpha$ -phellandrene (19.2%), and $\alpha$ -citronellol (17.3%)                                                                                             |           |
| <i>Corumbia citriodora</i> leaves EO     | MIC = 160 $\mu\text{g}\cdot\text{mL}^{-1}$                       | $\alpha$ -citronellal (56.0%), $\alpha$ -citronellol (14.7%), and citronellol acetate (12.3%)                                                                                        |           |
| <i>Duranta plumieri</i> variegata        | DIZ = 11.3 mm, at 2000 $\mu\text{g}\cdot\text{mL}^{-1}$          | 4,7-Dimethoxy-2-methylindan-1-one (66.67%), 5-(Hexadecyloxy)-2-pentadecyl-, trans-1,3-dioxane (8.64%), and 2-(2-Aminopropoxy)-3-methyl-benzenemethanol (5.46%)                       | [5]       |
| <i>Lantana camara</i> leaf PE            | DIZ = 12.3 mm, at 2000 $\mu\text{g}\cdot\text{mL}^{-1}$          | 5,8-Diethyl-dodecane (49.50%), Pyrimidin-2-one, 4-[N-methylureido]-1-[4-methylaminocarbonyloxymethyl] (36.26%), and oleic acid,3-(octadecyloxy)propil ester (9.17%)                  |           |
| <i>Citharexylum spinosum</i> leaf PE     | DIZ = 10.3 mm, at 2000 $\mu\text{g}\cdot\text{mL}^{-1}$          | 10-Octadecenoic acid, methyl ester (24.66%), N-[5-(3-Hydroxy-2-methylpropenyl)-1,3,4,5-tetrahydrobenzo[cd]indol-3-yl]-N-methylacetamide (17.02%), and 4,6-Dimethyl-undecane (13.35%) |           |
| <i>Origanum rotundifolium</i> EO         | MIC = 7.81 $\mu\text{L}\cdot\text{mL}^{-1}$                      | thymol (40.86%), carvacrol (43.62%), and p-cymene (5.95%)                                                                                                                            | [11]      |
| <i>Bougainvillea spectabilis</i> bark PE | DIZ = 12 mm, at 4000 $\mu\text{g}\cdot\text{mL}^{-1}$            | Nonanal (38.28%), cis-2-nonenal (9.75%), and octanal (8.16%)                                                                                                                         | [12]      |
| <i>Citharexylum spinosum</i> wood PE     | DIZ = 10 mm, at 4000 $\mu\text{g}\cdot\text{mL}^{-1}$            | 2-undecenal (22.39%), trans-2-decenal (18.74%), and oleic acid (10.85%)                                                                                                              |           |
| <i>Hyssopus officinalis</i> EO           | Sub-MIC = 10,000 $\mu\text{g}\cdot\text{mL}^{-1}$<br>DIZ = 11 mm | n.t.                                                                                                                                                                                 | [13]      |
| <i>Satureja khuzistanica</i> EO          | Sub-MIC = 90 $\mu\text{g}\cdot\text{mL}^{-1}$<br>DIZ = 28–29 mm  |                                                                                                                                                                                      |           |
| <i>Zataria multiflora</i> EO             | Sub-MIC = 110 $\mu\text{g}\cdot\text{mL}^{-1}$<br>DIZ = 23 mm    |                                                                                                                                                                                      |           |
| <i>Rhus ciliata</i> PE                   | n.a., at 2500 $\mu\text{g}\cdot\text{mL}^{-1}$                   | n.t.                                                                                                                                                                                 |           |
|                                          |                                                                  |                                                                                                                                                                                      | [14]      |

|                                                          |                                          |      |
|----------------------------------------------------------|------------------------------------------|------|
| <i>R. erosa</i> PE                                       | n.a., at 2500 µg·mL <sup>-1</sup>        |      |
| <i>R. lancea</i> PE                                      | n.a., at 2500 µg·mL <sup>-1</sup>        |      |
| <i>Asclepias fruticosa</i> PE                            | DIZ = 7 mm, at 2500 µg·mL <sup>-1</sup>  |      |
| <i>Protasparagus laricinus</i> PE                        | DIZ = 7 mm, at 2500 µg·mL <sup>-1</sup>  |      |
| <i>Bulbine asphodeloides</i> inflorescence PE            | n.a., at 2500 µg·mL <sup>-1</sup>        |      |
| <i>B. asphodeloides</i> root PE                          | DIZ = 9 mm, at 2500 µg·mL <sup>-1</sup>  |      |
| <i>Senecio radicans</i> PE                               | DIZ = 7 mm, at 2500 µg·mL <sup>-1</sup>  |      |
| <i>Vernonia oligocephala</i> PE                          | n.a., at 2500 µg·mL <sup>-1</sup>        |      |
| <b><i>Ehretia rigida</i></b> PE                          | DIZ = 7 mm, at 2500 µg·mL <sup>-1</sup>  |      |
| <i>Coccinia sessilifolia</i>                             | n.a., at 2500 µg·mL <sup>-1</sup>        |      |
| <i>Diospyros austro-africana</i> var. <i>microphylla</i> | n.a., at 2500 µg·mL <sup>-1</sup>        |      |
| <i>Euclea crispa</i> subsp. <i>crispa</i>                | DIZ = 10 mm, at 2500 µg·mL <sup>-1</sup> |      |
| <i>Acacia erioloba</i>                                   | DIZ = 13 mm, at 2500 µg·mL <sup>-1</sup> |      |
| <i>A. hebeclada</i> subsp. <i>hebeclada</i>              | DIZ = 7 mm, at 2500 µg·mL <sup>-1</sup>  |      |
| <i>A. karroo</i>                                         | n.a., at 2500 µg·mL <sup>-1</sup>        |      |
| <i>Elephantorrhiza elephantina</i>                       | n.a., at 2500 µg·mL <sup>-1</sup>        |      |
| <i>Senna italica</i> subsp. <i>arachoides</i>            | DIZ = 7 mm, at 2500 µg·mL <sup>-1</sup>  |      |
| <i>Buddleja saligna</i>                                  | DIZ = 11 mm, at 2500 µg·mL <sup>-1</sup> |      |
| <i>Olea europaea</i> subsp. <i>africana</i>              | n.a., at 2500 µg·mL <sup>-1</sup>        |      |
| <i>Rumex lanceolatus</i>                                 | n.a., at 2500 µg·mL <sup>-1</sup>        |      |
| <i>Clematis brachiata</i>                                | n.a., at 2500 µg·mL <sup>-1</sup>        |      |
| <i>Ranunculus multifidus</i>                             | n.a., at 2500 µg·mL <sup>-1</sup>        |      |
| <i>Ziziphus mucronata</i> subsp. <i>mucronata</i>        | n.a., at 2500 µg·mL <sup>-1</sup>        |      |
| <i>Osyris lanceolata</i>                                 | n.a., at 2500 µg·mL <sup>-1</sup>        |      |
| <i>Grewia flava</i>                                      | n.a., at 2500 µg·mL <sup>-1</sup>        |      |
| <i>G. occidentalis</i>                                   | n.a., at 2500 µg·mL <sup>-1</sup>        |      |
| <i>Datura stramonium</i> seed PE                         | DIZ = 20–26 mm                           |      |
| <i>Datura stramonium</i> leaf PE                         | DIZ = 19–24.66 mm                        |      |
| <i>Urtica dioica</i> leaf PE                             | DIZ = 19.33–25.33 mm                     |      |
| <i>Trigonella foenumgraecum</i> seed PE                  | DIZ = 17.66–23.33 mm                     |      |
| <i>Syzygium aromaticum</i> clove PE                      | DIZ = 15.66–22 mm                        | n.t. |
| <i>Salix alba</i> leaf PE                                | DIZ = 15.66–21.33 mm                     |      |
| <i>Hibiscus rosa-sinensis</i> leaf PE                    | DIZ = 15–21.33 mm                        |      |
| <i>Eucalyptus</i> sp. leaf PE                            | DIZ = 14.33–20.66 mm                     |      |
| <i>Azadirachta indica</i> leaf PE                        | DIZ = 14.33–20 mm                        |      |

|                                       |                                |     |      |
|---------------------------------------|--------------------------------|-----|------|
| <i>Conyza canadensis</i> leaf PE      | DIZ = 14–19.66 mm              |     |      |
| <i>Cupressus torulosa</i> leaf PE     | DIZ = 13–18.66 mm              |     |      |
| <i>Morus alba</i> leaf PE             | DIZ = 11.66–15.33 mm           |     |      |
| <i>Ficus carica</i> leaf PE           | DIZ = 11.66–15.33 mm           |     |      |
| <i>Polygonum hydropiper</i> leaf PE   | DIZ = 11–15.33 mm              |     |      |
| <i>Juglans regia</i> leaf PE          | DIZ = 11–15 mm                 |     |      |
| <i>Cannabis sativa</i> leaf PE        | DIZ = 10.66–14.66 mm           |     |      |
| <i>Ricinus communis</i> root PE       | DIZ = 10–13 mm                 |     |      |
| <i>Pinus</i> sp. needle PE            | DIZ = 9.66–12.33 mm            |     |      |
| <i>Populus alba</i> leaf PE           | DIZ = 9.66–12 mm               |     |      |
| <i>Artemisia absinthium</i> leaf PE   | DIZ = 9.5–12 mm                |     |      |
| <i>J. regia</i> fruit cover PE        | DIZ = 9.33–11.33 mm            |     |      |
| <i>Allium sativum</i> clove PE        | DIZ = 9–11 mm                  |     |      |
| <i>Anthemis cotula</i> leaf PE        | DIZ = 8.66–10.66 mm            |     |      |
| <i>Zingiber officinale</i> rhizome PE | DIZ = 8.66–10 mm               |     |      |
| <i>Plantago major</i> leaf PE         | DIZ = 4.66–8 mm                |     |      |
| <i>Lavandula</i> sp. leaf PE          | DIZ = 4.5–4.66 mm              |     |      |
| <i>Delonix regia</i> bark PE          | MIC = 2000 µg·mL <sup>-1</sup> | n.t | [10] |
| <i>Erythrina humeana</i> bark PE      | MIC = 2000 µg·mL <sup>-1</sup> |     |      |

**Table S7.** Effectiveness values reported in the literature for natural substances against *Dickeya chrysanthemi*.

| Extract / Essential Oil                | Effectiveness Values                                                  | Main Phytochemical Constituents                                                                                    | Ref.      |
|----------------------------------------|-----------------------------------------------------------------------|--------------------------------------------------------------------------------------------------------------------|-----------|
| <i>Taxus baccata</i> fruit extract     | MIC = 1500 µg·mL <sup>-1</sup>                                        | 5-hydroxymethylfurfural (13.3%); methyl 2-O-methyl-α-D-xylofuranoside (8.3%); and 1,3-dioxolane derivatives (8.2%) | This work |
| <i>T. baccata</i> bark extract         | MIC = 750 µg·mL <sup>-1</sup>                                         | 9-octadecenoic acid, methyl ester (15.7%); hexadecanoic acid, methyl ester (13.5%); and undecane (12.2%)           |           |
| <i>T. baccata</i> leaf extract         | MIC = 187.5 µg·mL <sup>-1</sup>                                       | 2-hexylthiophene (22.4%); 3-O-methyl-D-fructose (16.1%); and catechol (6.2%)                                       |           |
| <i>Salvia mukerjeei</i> aerial part EO | DIZ = 18 mm                                                           | β-Caryophyllene (28.7%), γ-Murolene (15.5%), and Dehydro-aromadendrane (9.5%)                                      | [16]      |
| <i>Inula cappa</i> aerial part EO      | DIZ = 9 mm                                                            | β-Caryophyllene (27.5%), cis-dihydro-mayurone (6.7%), and β-bisabolene (6.5%)                                      | [17]      |
| <i>Anisomeles indica</i> EO            | MIC = 31.25 µL·mL <sup>-1</sup>                                       | Abietadiene (20.5%), β-caryophyllene (8.8%), and linoleic acid (8.7%)                                              | [18]      |
| <i>Salvia hians</i> aerial part EO     | MIC = 31.25 µL·mL <sup>-1</sup>                                       | γ-cadinene (10.9%), δ-cadinene (9.2%), and caryophyllene acetate (9.7%)                                            | [19]      |
| <i>Origanum rotundifolium</i> EO       | MIC = 7.81 µL·mL <sup>-1</sup>                                        | thymol (40.86%), carvacrol (43.62%), and p-cymene (5.95%)                                                          | [11]      |
| <i>Thymus pallidus</i> leaf EO         | DIZ = 11.25 mm                                                        | α-terpinene (42.21%), thymol (23.95%), and methone (4.54%)                                                         | [20]      |
| <i>T. pallidus</i> leaf PE             | Inhibition at 100 mg of dry matter·mL of culture medium <sup>-1</sup> | n.t                                                                                                                |           |
| <i>Cananga odorata</i> EO              | DIZ = 8.33 mm                                                         | Phthalic acid (49.46%), linalool (14.52%), and benzyl acetate (13.46%)                                             |           |
| <i>Carum carvi</i> EO                  | DIZ = 3 mm                                                            | Limonene (54.42%), carvone (29.90%), and benzene (7.94%)                                                           | [21]      |
| <i>Cinnamomum camphora</i> EO          | DIZ = 5 mm                                                            | Iso camphene (16.78%), α-campholenal (14.97%), and β-4-dimethyl (14.80%)                                           |           |
| <i>C. cassia</i> EO                    | DIZ = 43 mm                                                           | (E)-cinnamaldehyde (66.36%), benzyl benzoate (10.24%), and β-linalool (9.16%)                                      |           |
| <i>C. zeylanicum</i> EO                | DIZ = 41.6 mm                                                         | (E)-cinnamaldehyde (64.13%), β-linalool (10.25%), and benzyl benzoate (9.26%)                                      |           |
| <i>Citrus bigaradia</i> EO             | DIZ = 24 mm                                                           | Linalool (56.51%), Linalyl acetate (24.12%), and Cymene (5.15%)                                                    |           |
| <i>Cymbopogon citratus</i> EO          | DIZ = 8.6 mm                                                          | Citral (29.40%), β-Citral (21.39%), and nerol acetate (10.81%)                                                     |           |
| <i>Laurus nobilis</i> EO               | DIZ = 3 mm                                                            | Eugenol (50.40%), benzyldehyde (10.96%), and caryophyllene (10.23%)                                                |           |
| <i>Syzygium aromaticum</i> EO          | DIZ = 10 mm                                                           | Eugenol (47.64%), benzyl alcohol (34.10%), and 3 allyl-6-methoxyphenol (4.98%)                                     |           |
| <i>T. vulgaris</i> EO                  | DIZ = 3 mm                                                            | Camphene (87.29%), p-cymol (6.50%), and terpinene (4.16%)                                                          |           |
| <i>Daucus carota</i> EO                | DIZ = 3 mm                                                            | n.t.                                                                                                               |           |
| <i>Foeniculum vulgare</i> EO           | DIZ = 7.66 mm                                                         |                                                                                                                    |           |
| <i>Gaultheria fragrantissima</i> EO    | DIZ = 3 mm                                                            |                                                                                                                    |           |
| <i>Jasminum grandiflorum</i> EO        | DIZ = 4 mm                                                            |                                                                                                                    |           |
| <i>Marjorana hortensis</i> EO          | DIZ = 7.33 mm                                                         |                                                                                                                    |           |
| <i>Melaleuca alternifolia</i> EO       | DIZ = 10 mm                                                           |                                                                                                                    |           |
| <i>M. leucadendron</i> EO              | DIZ = 13.6 mm                                                         |                                                                                                                    |           |
| <i>M. quinquenervia</i> EO             | DIZ = 8 mm                                                            |                                                                                                                    |           |
| <i>Nardostachys jatamansi</i> EO       | DIZ = 3 mm                                                            |                                                                                                                    |           |
| <i>Ocimum basilicum</i> EO             | DIZ = 5 mm                                                            |                                                                                                                    |           |

|                                    |                                            |      |      |
|------------------------------------|--------------------------------------------|------|------|
| <i>Pimpinella anisum</i> EO        | DIZ = 5 mm                                 |      |      |
| <i>Pinus sylvestris</i> EO         | DIZ = 5 mm                                 |      |      |
| <i>Pelargonium graveolens</i> EO   | DIZ = 9.33 mm                              |      |      |
| <i>Primula rosea</i> EO            | DIZ = 2 mm                                 |      |      |
| <i>Rosmarinus officinalis</i> EO   | DIZ = 4 mm                                 |      |      |
| <i>Simmondsia chinensis</i> EO     | DIZ = 3 mm                                 |      |      |
| <i>Triticum sativum</i> EO         | DIZ = 3 mm                                 |      |      |
| <i>Anethum graveolens</i> EO       | DIZ = 3 mm                                 |      |      |
| <i>Aniba rosaeodora</i> EO         | DIZ = 5 mm                                 |      |      |
| <i>Brarringtonia acutangula</i> EO | DIZ = 3 mm                                 |      |      |
| <i>Citrus limon</i> EO             | DIZ = 5 mm                                 |      |      |
| <i>C. aurantium</i> EO             | DIZ = 5 mm                                 |      |      |
| <i>Corylus avellana</i> EO         | DIZ = 4 mm                                 |      |      |
| <i>Crocus sativus</i> EO           | DIZ = 4 mm                                 |      |      |
| <i>Cupressus sempervirens</i> EO   | DIZ = 11 mm                                |      |      |
| <i>C. nobilis</i> leaf EO          | DIZ = 15.67 mm                             | n.t. | [22] |
| <i>C. nobilis</i> peel EO          | DIZ = 20 mm                                |      |      |
| <i>Delonix regia</i> bark PE       | MIC = 500 $\mu\text{g}\cdot\text{mL}^{-1}$ | n.t. | [10] |
| <i>Erythrina humeana</i> bark PE   | MIC = 500 $\mu\text{g}\cdot\text{mL}^{-1}$ |      |      |

MIC = Minimum Concentration Inhibition; MIC<sub>50</sub> = Minimum Concentration Inhibition at which 50% the isolates were inhibited; Sub-MIC = concentration of an antimicrobial agent that is not active on bacterial growth but is still active in altering bacterial biochemistry and shape; DIZ = Diameter Inhibition Zone (mm); PI = Percent Inhibition (%); PE = Plant Extract; EO = Essential Oil; n.a. = not activity; n.t. = not tested

## References (reference numbers do not match those that appear in the main document)

1. Ashmawy, N.A.; Al Farraj, D.A.; Salem, M.Z.M.; Elshikh, M.S.; Al-Kufaidy, R.; Alshammari, M.K.; Salem, A.Z.M. Potential impacts of *Pinus halepensis* Miller trees as a source of phytochemical compounds: antibacterial activity of the cones essential oil and n-butanol extract. *Agrofor. Syst.* **2018**, *94*, 1403-1413, doi:10.1007/s10457-018-0324-5.
2. Merad, N.; Andreu, V.; Chaib, S.; de Carvalho Augusto, R.; Duval, D.; Bertrand, C.; Boumghar, Y.; Pichette, A.; Djabou, N. Essential oils from two Apiaceae species as potential agents in organic crops protection. *Antibiotics* **2021**, *10*, 636, doi:10.3390/antibiotics10060636.
3. Gleason, M.; Paduch-Cichal, E.; Skutnik, E.; Kret, D.; Mirzwa-Mróz, E.; Gadomska-Gajadthur, A.; Schollenberger, M. The influence of plant essential oils on in vitro growth of *Pectobacterium* and *Dickeya* spp. bacteria. *Acta Sci. Pol. Hortorum Cultus* **2021**, *20*, 19-29, doi:10.24326/asphc.2021.6.3.
4. Salem, M.Z.M.; Elansary, H.O.; Ali, H.M.; El-Settawy, A.A.; Elshikh, M.S.; Abdel-Salam, E.M.; Skalicka-Woźniak, K. Bioactivity of essential oils extracted from *Cupressus macrocarpa* branchlets and *Corymbia citriodora* leaves grown in Egypt. *BMC Complement Altern. Med.* **2018**, *18*, doi:10.1186/s12906-018-2085-0.
5. Ashmawy, N.A.; Salem, M.Z.M.; El-Hefny, M.; Abd El-Kareem, M.S.M.; El-Shanhorey, N.A.; Mohamed, A.A.; Salem, A.Z.M. Antibacterial activity of the bioactive compounds identified in three woody plants against some pathogenic bacteria. *Microb. Pathog.* **2018**, *121*, 331-340, doi:10.1016/j.micpath.2018.05.032.
6. Meziani, S.; Oomah, B.D.; Zaidi, F.; Simon-Levert, A.; Bertrand, C.; Zaidi-Yahiaoui, R. Antibacterial activity of carob (*Ceratonia siliqua* L.) extracts against phytopathogenic bacteria *Pectobacterium atrosepticum*. *Microb. Pathog.* **2015**, *78*, 95-102, doi:10.1016/j.micpath.2014.12.001.
7. Jafarpour, M.; Golparvar, A.R.; Lotfi, A. Antibacterial activity of essential oils from *Thymus vulgaris*, *Trachyspermum ammi* and *Mentha aquatica* against *Erwinia carotovora* in vitro. *J. Med. Herb.* **2013**, *4*, 115-118.
8. Rakib, A.A.-A.; Mustafa, A.A.; Haidar, H.N. Antibacterial activity of clove, cinnamon, and datura extracts against *Erwinia carotovora* subsp. *atroseptica* causative agent of black stem and soft rot on potato. *J. Med. Plant Res.* **2012**, *6*, 1891-1895.
9. Viswanath, H.; Bhat, K.; Bhat, N.; Wani, T.; Mughal, M.N. Antibacterial efficacy of aqueous plant extracts against storage soft rot of potato caused by *Erwinia carotovora*. *Int. J. Curr. Microbiol. Appl. Sci.* **2018**, *7*, 2630-2639, doi:10.20546/ijcmas.2018.701.314.
10. Salem, M.Z. Evaluation of the antibacterial and antioxidant activities of stem bark extracts of *Delonix regia* and *Erythrina humeana* grown in Egypt. *J. Forest Prod. Ind* **2013**, *2*, 48-52.
11. Gormez, A.; Bozari, S.; Yanmis, D.; Gulluce, M.; Agar, G.; Sahin, F. The use of essential oils of *Origanum rotundifolium* as antimicrobial agent against plant pathogenic bacteria. *J. Essent. Oil-Bear. Plants* **2016**, *19*, 656-663, doi:10.1080/0972060X.2014.935052.
12. Ashmawy, N.A.; Behiry, S.I.; Al-Huqail, A.A.; Ali, H.M.; Salem, M.Z.M. Bioactivity of selected phenolic acids and hexane extracts from *Bougainvillea spectabilis* and *Citharexylum spinosum* on the growth of *Pectobacterium carotovorum* and *Dickeya solani* bacteria: An opportunity to save the environment. *Processes* **2020**, *8*, 482, doi:10.3390/pr8040482.
13. Hajian-Maleki, H.; Baghaee-Ravari, S.; Moghaddam, M. Efficiency of essential oils against *Pectobacterium carotovorum* subsp. *carotovorum* causing potato soft rot and their possible application as coatings in storage. *Postharvest Biol. Technol.* **2019**, *156*, 110928, doi:10.1016/j.postharvbio.2019.06.002.
14. Pretorius, J.C.; Magama, S.; Zietsman, P.C.; van Wyk, B.E. Growth inhibition of plant pathogenic bacteria and fungi by extracts from selected South African plant species. *S. Afr. J. Bot.* **2003**, *69*, 186-192, doi:10.1016/S0254-6299(15)30344-6.
15. Bhat, K.; Viswanath, H.; Bhat, N.; Wani, T. Bioactivity of various ethanolic plant extracts against *Pectobacterium carotovorum* subsp. *carotovorum* causing soft rot of potato tubers. *Indian Phytopathol.* **2017**, *70*, 463-470, doi:10.24838/ip.2017.v70.i4.76990.
16. Mohan, L.; Negi, A.; Melkani, A.B.; Dev, V. Chemical composition and antibacterial activity of essential oil from *Salvia mukurjeei*. *Nat. Prod. Commun.* **2011**, *6*, 1949-1952, doi:10.1177/1934578x1100601239.
17. Priyadarshi, R.; Melkani, A.B.; Mohan, L.; Pant, C.C. Terpenoid composition and antibacterial activity of the essential oil from *Inula cappa* (Buch-Ham. ex. D. Don) DC. *J. Essent. Oil Res.* **2016**, *28*, 172-176, doi:10.1080/10412905.2015.1090935.
18. Melkani, A.B.; Mohan, L.; Pant, C.C. Diterpene rich essential oil from *Anisomeles indica* (L.) O. Kuntz. and its antimicrobial activity. *World J. Pharma. Res* **2016**, *5*, 932-943.

19. Melkani, A.B.; Mohan, L.; Pant, C.C.; Negi, A.; Dev, V. Terpenoid composition and antibacterial activity of essential oil from *Salvia hians* Royle ex. Benth. *J. Essent. Oil-Bear. Plants* **2011**, *14*, 667-672, doi:10.1080/0972060X.2011.10643987.
20. Sqalli, H.; El Ouarti, A.; Farah, A.; Ennabili, A.; Haggoud, A.; Ibsouda, S.; Houari, A.; Iraqui, M.H. Antibacterial activity of *Thymus pallidus* Batt. and determination of the chemical composition of its essential oil. *Acta Bot. Gall.* **2009**, *156*, 303-310, doi:10.1080/12538078.2009.10516160.
21. Chudasama, K.S.; Thaker, V.S. Biological control of phytopathogenic bacteria *Pantoea agglomerans* and *Erwinia chrysanthemi* using 100 essential oils. *Arch. Phytopathol. Pflanzenschutz* **2014**, *47*, 2221-2232, doi:10.1080/03235408.2013.871435.
22. Mongkol, R.; Nilprapruck, P.; Yoshida, A. Antifungal and antibacterial activities of essential oil from Som Keaw (*Citrus nobilis*) in Thailand. *Int. J. Agric. Technol.* **2020**, *16*, 887-896.
